# Supplementary material for: Who Benefits Most? Interactions between Personality Traits and Outcomes of Four Incremental Meditation and Yoga Treatments
Source: MDPI journal article supplement (doi:10.3390/jcm11154553), 2022-08-04
Supplement: s1 [file s1]

## **Supplementary Material**

Who benefits most? Interactions between personality traits and outcomes of four incremental meditation and yoga treatments

Table S1

*Tau-U Effect Size Estimates for Each Participant in All Dependent Variables*

| Case | Attention | Arousal | Body<br>awareness | Emotion<br>Decentering | Emotion<br>regulation | Mind-<br>wandering | Self-<br>reflection | Stress | Valence | Wellbeing | Total |
|------|-----------|---------|-------------------|------------------------|-----------------------|--------------------|---------------------|--------|---------|-----------|-------|
| 1    | 0.30      | 0.23    | 0.67              | 0.47                   | -0.65                 | -0.71              | -0.02               | 0.07   | 0.18    | 0.25      | 0.23  |
| 2    | n.a.      | -0.09   | 0.56              | 0.74                   | -0.50                 | -0.68              | 0.06                | -0.12  | -0.20   | -0.11     | 0.27  |
| 3    | n.a.      | 0.12    | -0.11             | 0.39                   | -0.29                 | 0.63               | 0.37                | 0.29   | -0.09   | -0.46     | 0.00  |
| 4    | 0.12      | -0.24   | -0.37             | 0.13                   | 0.41                  | 0.40               | 0.22                | 0.27   | -0.39   | -0.51     | -0.19 |
| 5    | -0.74     | 0.04    | -0.56             | 0.29                   | -0.23                 | -0.48              | -0.49               | 0.37   | -0.25   | 0.24      | 0.03  |
| 6    | -0.13     | -0.12   | 0.50              | 0.58                   | -0.85                 | -0.19              | 0.34                | -0.22  | 0.18    | 0.13      | 0.32  |
| 7    | n.a.      | 0.05    | -0.07             | -0.25                  | n.a.                  | 0.30               | -0.54               | 0.03   | -0.21   | -0.16     | -0.20 |
| 8    | -0.20     | 0.10    | -0.07             | 0.07                   | -0.48                 | -0.53              | 0.55                | 0.30   | 0.34    | 0.16      | 0.18  |
| 9    | -0.48     | 0.40    | 0.62              | 0.67                   | -0.80                 | -0.60              | 0.66                | -0.53  | -0.13   | 0.06      | 0.39  |
| 10   | -0.87     | 0.10    | 0.70              | 0.88                   | 0.02                  | 0.07               | -0.42               | 0.59   | -0.14   | 0.07      | 0.12  |
| 11   | 0.01      | 0.47    | 0.63              | 0.49                   | 0.06                  | -0.31              | 0.58                | 0.38   | -0.01   | 0.21      | 0.13  |
| 12   | n.a.      | 0.23    | 0.43              | 0.56                   | -0.71                 | -0.03              | 0.67                | -0.39  | 0.25    | 0.36      | 0.35  |
| 13   | -0.76     | 0.05    | 0.70              | 0.19                   | -0.52                 | -0.39              | -0.29               | 0.20   | 0.37    | 0.14      | 0.25  |
| 14   | n.a.      | 0.18    | 0.40              | 0.47                   | -0.91                 | -0.23              | 0.60                | -0.73  | 0.13    | 0.45      | 0.41  |
| 15   | -0.25     | -0.33   | 0.87              | 0.89                   | -0.39                 | -0.32              | 0.06                | -0.24  | 0.36    | 0.46      | 0.42  |
| 16   | -0.54     | -0.25   | 0.63              | 0.29                   | 0.20                  | 0.23               | 0.61                | -0.29  | 0.08    | 0.31      | 0.26  |
| 17   | -0.24     | -0.21   | -0.28             | 0.29                   | -0.52                 | 0.39               | 0.66                | 0.15   | -0.19   | -0.15     | 0.08  |
| 18   | 0.45      | -0.27   | 0.26              | -0.11                  | -0.11                 | -0.13              | -0.16               | -0.15  | 0.33    | 0.36      | 0.09  |
| 19   | 0.09      | 0.13    | 0.67              | -0.11                  | -0.77                 | 0.52               | 0.68                | 0.27   | -0.22   | 0.06      | 0.08  |
| 20   | 0.62      | 0.11    | -0.33             | 0.00                   | -0.50                 | -0.48              | 0.21                | -0.71  | 0.10    | 0.14      | 0.11  |
| 21   | -0.84     | -0.14   | 0.11              | -0.50                  | -0.67                 | 0.04               | n.a.                | -0.33  | -0.16   | 0.30      | 0.19  |
| 22   | 0.22      | 0.01    | 0.85              | 0.91                   | -0.70                 | -0.33              | -0.06               | -0.74  | -0.05   | 0.43      | 0.36  |

SM: Who benefits most? Interactions between personality traits and outcomes

|    |       |       |       |       |       |       |       |       |       |       |       |
|----|-------|-------|-------|-------|-------|-------|-------|-------|-------|-------|-------|
| 23 | n.a.  | 0.00  | 0.51  | 0.92  | -0.82 | -0.39 | 0.87  | -0.44 | -0.14 | 0.00  | 0.42  |
| 24 | -0.56 | -0.07 | 0.59  | -0.26 | -0.38 | 0.31  | 0.50  | 0.29  | -0.12 | -0.14 | 0.10  |
| 25 | 0.30  | -0.12 | 0.48  | 0.81  | -0.57 | -0.18 | -0.75 | -0.21 | -0.08 | 0.15  | 0.14  |
| 26 | -0.54 | -0.35 | 0.67  | 0.06  | -0.71 | -0.86 | -0.13 | -0.69 | 0.26  | 0.27  | 0.43  |
| 27 | -0.61 | -0.26 | 0.44  | 0.32  | -0.42 | -0.33 | 0.29  | -0.39 | 0.04  | 0.25  | 0.34  |
| 28 | -0.48 | 0.00  | 0.81  | 0.71  | n.a.  | -0.55 | 0.57  | -0.61 | -0.21 | 0.22  | 0.42  |
| 29 | 0.29  | 0.18  | -0.58 | -0.67 | n.a.  | -0.60 | -0.95 | 0.40  | 0.07  | -0.14 | -0.28 |
| 30 | n.a.  | 0.18  | 0.28  | -0.24 | 0.20  | -0.25 | 0.15  | 0.35  | 0.19  | -0.14 | -0.02 |
| 31 | -0.56 | -0.03 | -0.56 | 0.43  | -0.33 | 0.20  | -0.30 | -0.41 | 0.07  | 0.09  | 0.09  |
| 32 | -0.10 | 0.36  | 0.55  | 0.57  | -0.50 | -0.51 | 0.72  | 0.25  | -0.19 | 0.33  | 0.25  |
| 33 | 0.07  | -0.12 | 0.60  | 0.68  | -0.75 | -0.52 | 0.81  | -0.11 | 0.12  | 0.19  | 0.38  |
| 34 | 0.00  | -0.12 | 0.46  | -0.67 | -0.20 | -0.11 | 0.00  | 0.83  | 0.26  | 0.34  | 0.00  |
| 35 | n.a.  | -0.27 | -0.31 | -0.57 | -0.70 | -0.48 | -0.22 | 0.33  | 0.16  | 0.23  | 0.05  |
| 36 | n.a.  | 0.15  | 0.29  | 0.54  | -0.43 | -0.39 | 0.42  | -0.63 | -0.03 | 0.37  | 0.32  |
| 37 | 0.00  | 0.21  | 0.43  | 0.54  | -0.61 | -0.67 | 0.29  | -0.25 | 0.04  | 0.25  | 0.29  |
| 38 | 0.16  | 0.38  | 0.38  | -0.53 | 0.57  | 0.32  | 0.26  | 0.87  | -0.25 | -0.30 | -0.28 |
| 39 | -0.30 | -0.30 | -0.40 | 0.52  | 0.08  | 0.13  | 0.20  | 0.09  | -0.21 | 0.24  | 0.06  |
| 40 | -0.01 | -0.25 | -0.59 | 0.35  | -0.32 | 0.24  | -0.40 | -0.41 | -0.09 | -0.09 | -0.01 |
| 41 | -0.09 | 0.27  | 0.47  | 0.36  | -0.53 | -0.24 | 0.29  | -1.00 | 0.03  | 0.19  | 0.29  |
| 42 | -0.16 | -0.09 | 0.13  | 0.69  | -0.33 | -0.35 | 0.31  | -0.17 | 0.18  | -0.04 | 0.24  |

*Note.* n.a. = not available

**Table S2**

*Full Regression Model for Attention as Dependent Variable and Components, Personality Traits and Sociodemographic Variables as Predictors (df = 13)*

| Variable                | <i>b</i> | $\beta$ | <i>SE</i> | <i>t</i> | <i>p</i> |
|-------------------------|----------|---------|-----------|----------|----------|
| (Intercept)             | -0.26    | 0.00    | 2.13      | -0.12    | 0.906    |
| Ethical education (y/n) | -0.06    | -0.07   | 0.27      | -0.21    | 0.419    |
| Physical yoga (y/n)     | -0.16    | -0.20   | 0.29      | -0.55    | 0.297    |
| Absorption              | -0.21    | -0.36   | 0.23      | -0.93    | 0.371    |
| Agreeableness           | 0.30     | 0.61    | 0.17      | 1.82     | 0.093    |
| Anxiety                 | 0.63     | 1.11    | 0.45      | 1.40     | 0.186    |
| Conscientiousness       | -0.54    | -0.80   | 0.37      | -1.45    | 0.170    |
| Distress tolerance      | -0.13    | -0.24   | 0.25      | -0.53    | 0.606    |
| Extraversion            | -0.16    | -0.41   | 0.15      | -1.10    | 0.293    |
| Life satisfaction       | 0.13     | 0.41    | 0.17      | 0.78     | 0.451    |
| Need for cognition      | 0.41     | 0.84    | 0.24      | 1.76     | 0.103    |
| Neuroticism             | -0.41    | -0.97   | 0.21      | -1.92    | 0.078    |
| Openness                | -0.44    | -0.79   | 0.21      | -2.08    | 0.058    |
| Sattva proportion       | 4.37     | 0.67    | 4.05      | 1.08     | 0.300    |
| Self-compassion         | -0.25    | -0.41   | 0.22      | -1.12    | 0.283    |
| Spirituality            | 0.33     | 0.52    | 0.23      | 1.42     | 0.180    |
| Age                     | 0.02     | 0.37    | 0.02      | 0.80     | 0.439    |
| Baseline                | 0.01     | 0.13    | 0.02      | 0.47     | 0.647    |
| Gender (male)           | 0.03     | 0.03    | 0.37      | 0.08     | 0.936    |
| Occupation (employed)   | -0.63    | -0.62   | 0.63      | -1.01    | 0.332    |
| Total practice time     | 0.00     | -0.11   | 0.00      | -0.35    | 0.733    |

**Table S3**

*Full Regression Model for Arousal as Dependent Variable and Components, Personality Traits and Sociodemographic Variables as Predictors (df = 21)*

| Variable                | <i>b</i> | $\beta$ | <i>SE</i> | <i>t</i> | <i>p</i> |
|-------------------------|----------|---------|-----------|----------|----------|
| (Intercept)             | 0.84     | 0.00    | 0.82      | 1.03     | 0.316    |
| Ethical education (y/n) | -0.07    | -0.17   | 0.09      | -0.84    | 0.206    |
| Physical yoga (y/n)     | -0.05    | -0.12   | 0.09      | -0.56    | 0.292    |
| Absorption              | 0.06     | 0.18    | 0.08      | 0.77     | 0.447    |
| Agreeableness           | -0.03    | -0.11   | 0.06      | -0.50    | 0.622    |
| Anxiety                 | -0.05    | -0.15   | 0.14      | -0.34    | 0.739    |
| Conscientiousness       | -0.03    | -0.07   | 0.09      | -0.30    | 0.766    |
| Distress tolerance      | 0.04     | 0.15    | 0.08      | 0.57     | 0.575    |
| Extraversion            | 0.13     | 0.63    | 0.05      | 2.59     | 0.017    |
| Life satisfaction       | -0.12    | -0.66   | 0.05      | -2.20    | 0.039    |
| Need for cognition      | -0.12    | -0.43   | 0.07      | -1.82    | 0.083    |
| Neuroticism             | 0.09     | 0.40    | 0.07      | 1.34     | 0.196    |
| Openness                | -0.08    | -0.25   | 0.08      | -1.07    | 0.299    |
| Sattva proportion       | 2.74     | 0.74    | 1.36      | 2.02     | 0.057    |
| Self-compassion         | -0.14    | -0.37   | 0.08      | -1.67    | 0.110    |
| Spirituality            | -0.15    | -0.46   | 0.09      | -1.64    | 0.116    |
| Age                     | -0.01    | -0.47   | 0.01      | -2.04    | 0.055    |
| Baseline                | -0.01    | -0.29   | 0.01      | -1.65    | 0.115    |
| Gender (male)           | -0.04    | -0.07   | 0.13      | -0.31    | 0.756    |
| Occupation (employed)   | 0.25     | 0.40    | 0.15      | 1.63     | 0.119    |
| Total practice time     | 0.00     | 0.20    | 0.00      | 0.95     | 0.354    |

**Table S4**

*Full Regression Model for Body Awareness as Dependent Variable and Components, Personality Traits and Sociodemographic Variables as Predictors (df = 21)*

| Variable                | <i>b</i> | $\beta$ | <i>SE</i> | <i>t</i> | <i>p</i> |
|-------------------------|----------|---------|-----------|----------|----------|
| (Intercept)             | 0.93     | 0.00    | 2.21      | 0.42     | 0.679    |
| Ethical education (y/n) | -0.10    | -0.12   | 0.23      | -0.43    | 0.335    |
| Physical yoga (y/n)     | 0.26     | 0.30    | 0.25      | 1.04     | 0.152    |
| Absorption              | 0.38     | 0.57    | 0.21      | 1.83     | 0.081    |
| Agreeableness           | -0.12    | -0.21   | 0.16      | -0.74    | 0.467    |
| Anxiety                 | -0.06    | -0.09   | 0.39      | -0.15    | 0.881    |
| Conscientiousness       | -0.03    | -0.04   | 0.23      | -0.13    | 0.895    |
| Distress tolerance      | 0.05     | 0.08    | 0.21      | 0.25     | 0.809    |
| Extraversion            | -0.02    | -0.05   | 0.14      | -0.14    | 0.891    |
| Life satisfaction       | -0.08    | -0.23   | 0.15      | -0.56    | 0.579    |
| Need for cognition      | 0.06     | 0.11    | 0.18      | 0.35     | 0.733    |
| Neuroticism             | 0.05     | 0.10    | 0.19      | 0.25     | 0.807    |
| Openness                | -0.26    | -0.39   | 0.21      | -1.25    | 0.226    |
| Sattva proportion       | 4.10     | 0.54    | 3.69      | 1.11     | 0.279    |
| Self-compassion         | -0.28    | -0.38   | 0.22      | -1.28    | 0.214    |
| Spirituality            | -0.19    | -0.29   | 0.25      | -0.77    | 0.449    |
| Age                     | -0.02    | -0.46   | 0.02      | -1.51    | 0.146    |
| Baseline                | 0.00     | 0.04    | 0.02      | 0.16     | 0.878    |
| Gender (male)           | -0.18    | -0.15   | 0.35      | -0.50    | 0.619    |
| Occupation (employed)   | 0.57     | 0.46    | 0.41      | 1.40     | 0.175    |
| Total practice time     | 0.00     | 0.06    | 0.00      | 0.21     | 0.837    |

**Table S5**

*Full Regression Model for Decentering as Dependent Variable and Components, Personality Traits and Sociodemographic Variables as Predictors (df = 21)*

| Variable                | <i>b</i> | $\beta$ | <i>SE</i> | <i>t</i> | <i>p</i> |
|-------------------------|----------|---------|-----------|----------|----------|
| (Intercept)             | -1.33    | 0.00    | 1.51      | -0.88    | 0.387    |
| Ethical education (y/n) | -0.19    | -0.21   | 0.16      | -1.19    | 0.123    |
| Physical yoga (y/n)     | 0.14     | 0.15    | 0.17      | 0.80     | 0.228    |
| Absorption              | 0.29     | 0.42    | 0.14      | 2.01     | 0.057    |
| Agreeableness           | -0.16    | -0.27   | 0.11      | -1.44    | 0.164    |
| Anxiety                 | 0.62     | 0.92    | 0.27      | 2.32     | 0.031    |
| Conscientiousness       | -0.29    | -0.38   | 0.16      | -1.86    | 0.078    |
| Distress tolerance      | 0.01     | 0.01    | 0.14      | 0.04     | 0.971    |
| Extraversion            | 0.02     | 0.05    | 0.10      | 0.23     | 0.824    |
| Life satisfaction       | 0.16     | 0.42    | 0.10      | 1.59     | 0.128    |
| Need for cognition      | 0.01     | 0.01    | 0.12      | 0.05     | 0.963    |
| Neuroticism             | -0.09    | -0.20   | 0.13      | -0.74    | 0.466    |
| Openness                | -0.37    | -0.54   | 0.14      | -2.58    | 0.018    |
| Sattva proportion       | 8.27     | 1.07    | 2.52      | 3.29     | 0.004    |
| Self-compassion         | 0.06     | 0.08    | 0.15      | 0.41     | 0.688    |
| Spirituality            | -0.32    | -0.46   | 0.17      | -1.86    | 0.078    |
| Age                     | -0.03    | -0.46   | 0.01      | -2.28    | 0.033    |
| Baseline                | -0.01    | -0.09   | 0.01      | -0.56    | 0.585    |
| Gender (male)           | -0.44    | -0.37   | 0.24      | -1.85    | 0.078    |
| Occupation (employed)   | 0.06     | 0.05    | 0.28      | 0.21     | 0.836    |
| Total practice time     | 0.00     | -0.08   | 0.00      | -0.43    | 0.672    |

**Table S6**

*Full Regression Model for Emotion Regulation as Dependent Variable and Components, Personality Traits and Sociodemographic Variables as Predictors (df = 18)*

| Variable                | <i>b</i> | $\beta$ | <i>SE</i> | <i>t</i> | <i>p</i> |
|-------------------------|----------|---------|-----------|----------|----------|
| (Intercept)             | 0.30     | 0.00    | 1.19      | 0.25     | 0.805    |
| Ethical education (y/n) | 0.11     | 0.15    | 0.13      | 0.83     | 0.208    |
| Physical yoga (y/n)     | 0.08     | 0.11    | 0.14      | 0.56     | 0.291    |
| Absorption              | 0.10     | 0.19    | 0.12      | 0.86     | 0.401    |
| Agreeableness           | -0.11    | -0.26   | 0.09      | -1.29    | 0.214    |
| Anxiety                 | 0.39     | 0.72    | 0.21      | 1.85     | 0.082    |
| Conscientiousness       | -0.17    | -0.28   | 0.14      | -1.22    | 0.238    |
| Distress tolerance      | 0.09     | 0.18    | 0.13      | 0.71     | 0.490    |
| Extraversion            | -0.08    | -0.22   | 0.08      | -1.08    | 0.295    |
| Life satisfaction       | 0.03     | 0.08    | 0.10      | 0.25     | 0.804    |
| Need for cognition      | 0.09     | 0.19    | 0.10      | 0.82     | 0.422    |
| Neuroticism             | 0.01     | 0.02    | 0.10      | 0.07     | 0.948    |
| Openness                | -0.04    | -0.07   | 0.12      | -0.31    | 0.760    |
| Sattva proportion       | 3.21     | 0.54    | 2.04      | 1.58     | 0.133    |
| Self-compassion         | -0.25    | -0.42   | 0.12      | -2.05    | 0.055    |
| Spirituality            | -0.22    | -0.41   | 0.14      | -1.56    | 0.136    |
| Age                     | -0.01    | -0.25   | 0.01      | -1.14    | 0.271    |
| Baseline                | -0.02    | -0.30   | 0.01      | -1.74    | 0.099    |
| Gender (male)           | -0.16    | -0.18   | 0.19      | -0.86    | 0.403    |
| Occupation (employed)   | -0.09    | -0.09   | 0.23      | -0.39    | 0.701    |
| Total practice time     | 0.00     | 0.02    | 0.00      | 0.08     | 0.937    |



**Table S7**

*Full Regression Model for Mind-Wandering as Dependent Variable and Components, Personality Traits and Sociodemographic Variables as Predictors (df = 21)*

| Variable                | <i>b</i> | $\beta$ | <i>SE</i> | <i>t</i> | <i>p</i> |
|-------------------------|----------|---------|-----------|----------|----------|
| (Intercept)             | -0.28    | 0.00    | 1.61      | -0.18    | 0.861    |
| Ethical education (y/n) | -0.01    | -0.01   | 0.17      | -0.03    | 0.487    |
| Physical yoga (y/n)     | -0.35    | -0.47   | 0.18      | -1.89    | 0.036    |
| Absorption              | -0.34    | -0.60   | 0.15      | -2.24    | 0.036    |
| Agreeableness           | 0.09     | 0.18    | 0.12      | 0.76     | 0.455    |
| Anxiety                 | -0.05    | -0.08   | 0.28      | -0.16    | 0.872    |
| Conscientiousness       | 0.10     | 0.15    | 0.17      | 0.58     | 0.566    |
| Distress tolerance      | 0.03     | 0.07    | 0.15      | 0.23     | 0.824    |
| Extraversion            | -0.01    | -0.03   | 0.10      | -0.10    | 0.924    |
| Life satisfaction       | -0.03    | -0.09   | 0.11      | -0.28    | 0.783    |
| Need for cognition      | -0.12    | -0.24   | 0.13      | -0.90    | 0.379    |
| Neuroticism             | -0.20    | -0.48   | 0.14      | -1.44    | 0.166    |
| Openness                | 0.15     | 0.27    | 0.15      | 1.00     | 0.331    |
| Sattva proportion       | -2.26    | -0.35   | 2.68      | -0.84    | 0.408    |
| Self-compassion         | 0.01     | 0.02    | 0.16      | 0.08     | 0.935    |
| Spirituality            | 0.39     | 0.68    | 0.18      | 2.15     | 0.043    |
| Age                     | 0.01     | 0.31    | 0.01      | 1.18     | 0.252    |
| Baseline                | 0.03     | 0.47    | 0.01      | 2.33     | 0.030    |
| Gender (male)           | 0.19     | 0.19    | 0.25      | 0.74     | 0.470    |
| Occupation (employed)   | -0.09    | -0.08   | 0.30      | -0.29    | 0.774    |
| Total practice time     | 0.00     | 0.15    | 0.00      | 0.65     | 0.522    |

**Table S8**

*Full Regression Model for Self-Reflection as Dependent Variable and Components, Personality Traits and Sociodemographic Variables as Predictors (df = 20)*

| Variable                | <i>b</i> | $\beta$ | <i>SE</i> | <i>t</i> | <i>p</i> |
|-------------------------|----------|---------|-----------|----------|----------|
| (Intercept)             | 0.55     | 0.00    | 2.24      | 0.25     | 0.807    |
| Ethical education (y/n) | 0.10     | 0.12    | 0.22      | 0.47     | 0.322    |
| Physical yoga (y/n)     | -0.10    | -0.11   | 0.24      | -0.41    | 0.345    |
| Absorption              | -0.01    | -0.01   | 0.20      | -0.05    | 0.961    |
| Agreeableness           | 0.09     | 0.16    | 0.15      | 0.58     | 0.569    |
| Anxiety                 | 0.14     | 0.21    | 0.38      | 0.36     | 0.719    |
| Conscientiousness       | -0.18    | -0.23   | 0.23      | -0.79    | 0.441    |
| Distress tolerance      | -0.01    | -0.01   | 0.20      | -0.04    | 0.971    |
| Extraversion            | 0.10     | 0.24    | 0.13      | 0.76     | 0.459    |
| Life satisfaction       | 0.09     | 0.24    | 0.14      | 0.65     | 0.526    |
| Need for cognition      | 0.19     | 0.33    | 0.17      | 1.10     | 0.286    |
| Neuroticism             | -0.03    | -0.06   | 0.18      | -0.17    | 0.869    |
| Openness                | -0.31    | -0.47   | 0.20      | -1.58    | 0.130    |
| Sattva proportion       | -2.64    | -0.34   | 3.96      | -0.67    | 0.512    |
| Self-compassion         | -0.06    | -0.08   | 0.21      | -0.31    | 0.764    |
| Spirituality            | 0.21     | 0.31    | 0.24      | 0.87     | 0.397    |
| Age                     | 0.00     | -0.03   | 0.02      | -0.12    | 0.907    |
| Baseline                | 0.00     | 0.00    | 0.02      | 0.02     | 0.984    |
| Gender (male)           | 0.04     | 0.03    | 0.33      | 0.12     | 0.902    |
| Occupation (employed)   | -0.02    | -0.02   | 0.38      | -0.06    | 0.953    |
| Total practice time     | 0.00     | 0.19    | 0.00      | 0.73     | 0.474    |

**Table S9**

*Full Regression Model for Stress as Dependent Variable and Components, Personality Traits and Sociodemographic Variables as Predictors (df = 21)*

| Variable                | <i>b</i> | $\beta$ | <i>SE</i> | <i>t</i> | <i>p</i> |
|-------------------------|----------|---------|-----------|----------|----------|
| (Intercept)             | -1.55    | 0.00    | 2.43      | -0.64    | 0.530    |
| Ethical education (y/n) | -0.02    | -0.02   | 0.26      | -0.07    | 0.474    |
| Physical yoga (y/n)     | -0.10    | -0.11   | 0.28      | -0.36    | 0.361    |
| Absorption              | -0.09    | -0.13   | 0.23      | -0.39    | 0.703    |
| Agreeableness           | 0.04     | 0.07    | 0.18      | 0.23     | 0.820    |
| Anxiety                 | -0.04    | -0.06   | 0.43      | -0.09    | 0.933    |
| Conscientiousness       | 0.21     | 0.27    | 0.26      | 0.83     | 0.418    |
| Distress tolerance      | 0.12     | 0.20    | 0.23      | 0.53     | 0.599    |
| Extraversion            | 0.14     | 0.33    | 0.15      | 0.94     | 0.357    |
| Life satisfaction       | -0.09    | -0.26   | 0.16      | -0.59    | 0.559    |
| Need for cognition      | -0.10    | -0.18   | 0.20      | -0.52    | 0.612    |
| Neuroticism             | 0.10     | 0.22    | 0.21      | 0.51     | 0.617    |
| Openness                | 0.08     | 0.13    | 0.23      | 0.37     | 0.717    |
| Sattva proportion       | -0.55    | -0.07   | 4.05      | -0.14    | 0.893    |
| Self-compassion         | 0.04     | 0.05    | 0.24      | 0.16     | 0.876    |
| Spirituality            | 0.06     | 0.09    | 0.28      | 0.23     | 0.819    |
| Age                     | 0.01     | 0.13    | 0.02      | 0.39     | 0.700    |
| Baseline                | 0.00     | -0.01   | 0.02      | -0.03    | 0.977    |
| Gender (male)           | 0.49     | 0.41    | 0.38      | 1.26     | 0.220    |
| Occupation (employed)   | 0.13     | 0.11    | 0.45      | 0.30     | 0.768    |
| Total practice time     | 0.00     | -0.08   | 0.00      | -0.25    | 0.802    |

**Table S10**

*Full Regression Model for Valence as Dependent Variable and Components, Personality Traits and Sociodemographic Variables as Predictors (df = 21)*

| Variable                | <i>b</i> | $\beta$ | <i>SE</i> | <i>t</i> | <i>p</i> |
|-------------------------|----------|---------|-----------|----------|----------|
| (Intercept)             | -0.39    | 0.00    | 1.02      | -0.38    | 0.709    |
| Ethical education (y/n) | 0.15     | 0.40    | 0.11      | 1.43     | 0.084    |
| Physical yoga (y/n)     | 0.02     | 0.05    | 0.12      | 0.15     | 0.440    |
| Absorption              | 0.01     | 0.02    | 0.10      | 0.06     | 0.950    |
| Agreeableness           | -0.15    | -0.59   | 0.07      | -2.01    | 0.057    |
| Anxiety                 | 0.12     | 0.40    | 0.18      | 0.64     | 0.527    |
| Conscientiousness       | 0.00     | -0.01   | 0.11      | -0.02    | 0.984    |
| Distress tolerance      | 0.06     | 0.23    | 0.10      | 0.66     | 0.517    |
| Extraversion            | 0.01     | 0.04    | 0.06      | 0.11     | 0.912    |
| Life satisfaction       | 0.03     | 0.18    | 0.07      | 0.44     | 0.663    |
| Need for cognition      | -0.05    | -0.18   | 0.08      | -0.56    | 0.581    |
| Neuroticism             | 0.02     | 0.08    | 0.09      | 0.20     | 0.843    |
| Openness                | 0.09     | 0.29    | 0.10      | 0.88     | 0.391    |
| Sattva proportion       | 1.26     | 0.37    | 1.71      | 0.74     | 0.470    |
| Self-compassion         | -0.01    | -0.03   | 0.10      | -0.09    | 0.932    |
| Spirituality            | -0.13    | -0.44   | 0.12      | -1.14    | 0.266    |
| Age                     | 0.00     | -0.13   | 0.01      | -0.40    | 0.691    |
| Baseline                | -0.01    | -0.22   | 0.01      | -0.88    | 0.389    |
| Gender (male)           | -0.10    | -0.20   | 0.16      | -0.63    | 0.536    |
| Occupation (employed)   | 0.02     | 0.04    | 0.19      | 0.11     | 0.914    |
| Total practice time     | 0.00     | -0.06   | 0.00      | -0.19    | 0.849    |

**Table S11**

*Full Regression Model for Well-Being as Dependent Variable and Components, Personality Traits and Sociodemographic Variables as Predictors (df = 21)*

| Variable                | <i>b</i> | $\beta$ | <i>SE</i> | <i>t</i> | <i>p</i> |
|-------------------------|----------|---------|-----------|----------|----------|
| (Intercept)             | -0.19    | 0.00    | 0.90      | -0.21    | 0.835    |
| Ethical education (y/n) | 0.28     | 0.61    | 0.09      | 2.97     | 0.004    |
| Physical yoga (y/n)     | 0.14     | 0.30    | 0.10      | 1.32     | 0.109    |
| Absorption              | 0.21     | 0.61    | 0.08      | 2.52     | 0.020    |
| Agreeableness           | 0.05     | 0.17    | 0.06      | 0.76     | 0.456    |
| Anxiety                 | -0.03    | -0.08   | 0.16      | -0.19    | 0.855    |
| Conscientiousness       | -0.12    | -0.31   | 0.09      | -1.30    | 0.206    |
| Distress tolerance      | -0.04    | -0.13   | 0.08      | -0.51    | 0.615    |
| Extraversion            | -0.06    | -0.25   | 0.06      | -1.01    | 0.326    |
| Life satisfaction       | 0.06     | 0.30    | 0.06      | 0.99     | 0.336    |
| Need for cognition      | 0.08     | 0.28    | 0.07      | 1.14     | 0.266    |
| Neuroticism             | 0.10     | 0.41    | 0.08      | 1.35     | 0.190    |
| Openness                | 0.03     | 0.08    | 0.09      | 0.31     | 0.757    |
| Sattva proportion       | 1.86     | 0.47    | 1.50      | 1.24     | 0.228    |
| Self-compassion         | -0.03    | -0.07   | 0.09      | -0.30    | 0.769    |
| Spirituality            | -0.29    | -0.83   | 0.10      | -2.88    | 0.009    |
| Age                     | -0.01    | -0.51   | 0.01      | -2.16    | 0.043    |
| Baseline                | 0.00     | -0.01   | 0.01      | -0.07    | 0.945    |
| Gender (male)           | -0.13    | -0.21   | 0.14      | -0.92    | 0.366    |
| Occupation (employed)   | 0.06     | 0.09    | 0.17      | 0.37     | 0.713    |
| Total practice time     | 0.00     | -0.51   | 0.00      | -2.43    | 0.024    |

**Table S12**

*Full Regression Model for the Total Effect as Dependent Variable and Components, Personality Traits and Sociodemographic Variables as Predictors (df = 21)*

| Variable                 | <i>b</i> | $\beta$ | <i>SE</i> | <i>t</i> | <i>p</i> |
|--------------------------|----------|---------|-----------|----------|----------|
| (Intercept)              | 0.10     | 0.00    | 0.85      | 0.12     | 0.907    |
| Ethical education (y/n)  | 0.03     | 0.08    | 0.09      | 0.35     | 0.366    |
| Physical yoga (y/n)      | 0.10     | 0.27    | 0.10      | 1.05     | 0.153    |
| Absorption               | 0.14     | 0.47    | 0.08      | 1.70     | 0.104    |
| Agreeableness            | -0.03    | -0.13   | 0.06      | -0.54    | 0.598    |
| Anxiety                  | 0.15     | 0.52    | 0.15      | 0.99     | 0.332    |
| Conscientiousness        | -0.14    | -0.43   | 0.09      | -1.59    | 0.127    |
| Distress tolerance       | -0.02    | -0.08   | 0.08      | -0.27    | 0.792    |
| Extraversion             | -0.03    | -0.15   | 0.05      | -0.52    | 0.608    |
| Life satisfaction        | 0.08     | 0.49    | 0.06      | 1.39     | 0.178    |
| Need for cognition       | 0.10     | 0.39    | 0.07      | 1.39     | 0.179    |
| Neuroticism              | -0.01    | -0.05   | 0.07      | -0.15    | 0.884    |
| Openness                 | -0.13    | -0.44   | 0.08      | -1.58    | 0.129    |
| Sattva proportion        | 1.64     | 0.50    | 1.41      | 1.16     | 0.259    |
| Self-compassion          | -0.06    | -0.18   | 0.08      | -0.67    | 0.508    |
| Spirituality             | -0.12    | -0.41   | 0.10      | -1.23    | 0.231    |
| Age                      | -0.01    | -0.41   | 0.01      | -1.52    | 0.145    |
| Baseline                 | 0.00     | -0.07   | 0.01      | -0.36    | 0.725    |
| Gender (male)            | -0.16    | -0.32   | 0.13      | -1.22    | 0.237    |
| Occupation<br>(employed) | 0.04     | 0.08    | 0.16      | 0.27     | 0.791    |
| Total practice time      | 0.00     | -0.09   | 0.00      | -0.36    | 0.721    |

**Figure S1**

*Dendrogram of Relative Distances Between Participants Regarding Their Personality Traits*

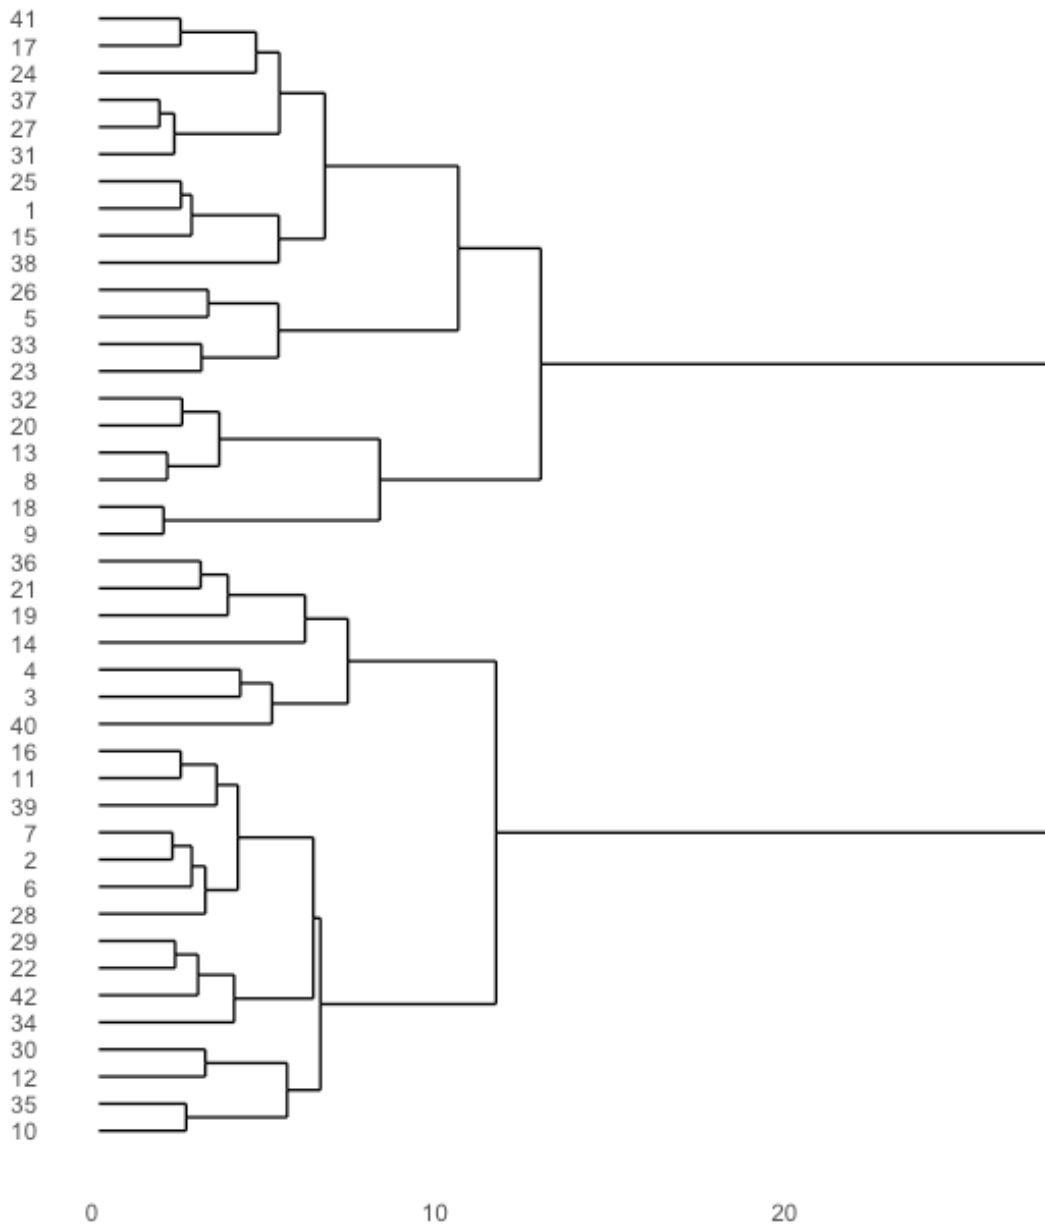

*Note.* Generated with the R package *ggdendro* (de Vries & Ripley, 2020).

**Table S13**

*Means, Standard Deviations and t-Test Results Comparing the Manifestation of Personality Traits in Both Clusters ( $n_1 = 24$ ,  $n_2 = 18$ )*

| Variable           | <i>M</i> | <i>SD</i> | <i>t</i> | <i>df</i> | <i>p</i> | <i>r</i> |
|--------------------|----------|-----------|----------|-----------|----------|----------|
| Absorption         | 3.00     | 0.62      | -2.32    | 35.6      | 0.026    | 0.13     |
|                    | 3.46     | 0.65      |          |           |          |          |
| Agreeableness      | 2.99     | 0.80      | -1.19    | 38.0      | 0.240    | 0.04     |
|                    | 3.28     | 0.75      |          |           |          |          |
| Anxiety            | 3.07     | 0.42      | 5.32     | 28.5      | 0.000    | 0.50     |
|                    | 2.18     | 0.61      |          |           |          |          |
| Conscientiousness  | 3.34     | 0.55      | -3.22    | 38.8      | 0.003    | 0.21     |
|                    | 3.86     | 0.49      |          |           |          |          |
| Distress tolerance | 3.18     | 0.64      | -2.43    | 32.8      | 0.021    | 0.15     |
|                    | 3.71     | 0.76      |          |           |          |          |
| Extraversion       | 2.69     | 0.81      | -5.08    | 36.7      | 0.000    | 0.41     |
|                    | 3.97     | 0.81      |          |           |          |          |
| Life satisfaction  | 4.25     | 1.17      | -5.22    | 37.6      | 0.000    | 0.42     |
|                    | 5.73     | 0.66      |          |           |          |          |
| Need for cognition | 3.50     | 0.83      | -2.11    | 40.0      | 0.041    | 0.10     |
|                    | 3.97     | 0.60      |          |           |          |          |
| Neuroticism        | 3.57     | 0.76      | 3.01     | 31.9      | 0.005    | 0.22     |
|                    | 2.75     | 0.95      |          |           |          |          |
| Openness           | 3.96     | 0.78      | -2.36    | 35.4      | 0.024    | 0.14     |
|                    | 4.39     | 0.39      |          |           |          |          |
| Sattva proportion  | 0.36     | 0.03      | -6.70    | 29.2      | 0.000    | 0.61     |
|                    | 0.45     | 0.05      |          |           |          |          |
| Self-compassion    | 2.64     | 0.41      | -5.80    | 33.3      | 0.000    | 0.50     |
|                    | 3.45     | 0.47      |          |           |          |          |
| Spirituality       | 2.92     | 0.63      | -3.32    | 39.4      | 0.002    | 0.22     |
|                    | 3.52     | 0.53      |          |           |          |          |

*Note.* The upper values (*M*, *SD*) represents the values of Cluster 1, the lower values of Cluster 2.



**Table S14**

*Means, Standard Deviations and t-Test Results Comparing the Effects on All Dependent Variables in Both Clusters ( $n_1 = 24$ ,  $n_2 = 18$ )*

| Variable           | <i>M</i> | <i>SD</i> | <i>t</i> | <i>df</i> | <i>p</i> | <i>r</i> |
|--------------------|----------|-----------|----------|-----------|----------|----------|
| Attention          | 0.24     | 0.35      | 0.78     | 28.9      | 0.442    | 0.02     |
|                    | 0.13     | 0.44      |          |           |          |          |
| Arousal            | 0.03     | 0.19      | 0.88     | 31.1      | 0.384    | 0.02     |
|                    | -0.03    | 0.25      |          |           |          |          |
| Body awareness     | 0.34     | 0.39      | 1.11     | 31.4      | 0.277    | 0.04     |
|                    | 0.18     | 0.50      |          |           |          |          |
| Decentering        | 0.24     | 0.50      | -0.78    | 40.0      | 0.437    | 0.02     |
|                    | 0.34     | 0.38      |          |           |          |          |
| Emotion regulation | 0.57     | 0.18      | 3.61     | 22.9      | 0.001    | 0.36     |
|                    | 0.20     | 0.41      |          |           |          |          |
| Mind-wandering     | -0.24    | 0.41      | -0.99    | 39.9      | 0.330    | 0.02     |
|                    | -0.13    | 0.33      |          |           |          |          |
| Self-reflection    | 0.24     | 0.46      | 1.00     | 37.5      | 0.325    | 0.03     |
|                    | 0.10     | 0.43      |          |           |          |          |
| Stress             | -0.10    | 0.46      | -0.34    | 37.4      | 0.738    | 0.00     |
|                    | -0.06    | 0.44      |          |           |          |          |
| Valence            | 0.01     | 0.20      | 0.19     | 36.4      | 0.847    | 0.00     |
|                    | 0.00     | 0.20      |          |           |          |          |
| Well-being         | 0.11     | 0.22      | -0.31    | 34.0      | 0.760    | 0.00     |
|                    | 0.13     | 0.25      |          |           |          |          |
| Total Effect       | 0.20     | 0.19      | 1.11     | 36.3      | 0.273    | 0.03     |
|                    | 0.13     | 0.19      |          |           |          |          |

*Note.* The upper values (*M*, *SD*) represent the values of Cluster 1, the lower values of Cluster 2.
